# Supplementary material for: Prevention and management of COVID-19 among patients with diabetes: an appraisal of the literature
Source: Springer Nature journal article supplement (doi:10.1007/s00125-020-05164-x), 2020-05-14
Supplement: MOESM1 [file 17982946]

**ESM Table 1**

**Summary of selected guidelines on specific pharmacological management of COVID-19\***

| <b>Source</b>                                                                                                        | <b>When to treat</b>                                              | <b>Mild disease</b>                                                                                                                                                                           | <b>Severe disease</b>                                                                                                                |
|----------------------------------------------------------------------------------------------------------------------|-------------------------------------------------------------------|-----------------------------------------------------------------------------------------------------------------------------------------------------------------------------------------------|--------------------------------------------------------------------------------------------------------------------------------------|
| WHO interim guidelines (12 <sup>th</sup> March 2020)                                                                 | No evidence to recommend specific therapy                         | No evidence to recommend specific therapy                                                                                                                                                     | No evidence to recommend specific therapy                                                                                            |
| Center for Disease Control and Prevention (CDC), Atlanta, USA                                                        | PCR Confirmed COVID-19                                            | <b>URTI:</b><br>CQ 500 mg BID 5d OR<br>Oseltamivir 150 mg BID 5d                                                                                                                              | CQ 500 mg BID 5d plus Darunavir 800 mg / Cobicistat 150 mg QD 14d OR<br>• Atazanavir 400 mg QD 14d plus<br>Oseltamivir 150 mg BID 5d |
| Surviving Sepsis Campaign, (SCCM & ESICM)                                                                            | Insufficient evidence; no recommendation                          | Insufficient evidence; no recommendation                                                                                                                                                      | Insufficient evidence; no recommendation                                                                                             |
| China: Expert consensus from Department of Science and Technology and Health Commission of Guangdong province, China | Confirmed COVID-19                                                | <b>For mild moderate or severe coronavirus pneumonia:</b><br>CQ 500 mg BID 10d                                                                                                                |                                                                                                                                      |
| Korea: Central Clinical Task Force                                                                                   | Moderate to severe disease, or elderly or multiple co-morbidities | Supportive care only                                                                                                                                                                          | <b>Moderate to severe disease:</b><br>Lopinavir 400mg/Ritonavir 100mg BID or<br>CQ 500mg QD or HCQ 400mg QD 7-10d                    |
| Italy: Italian Society of Infectious and Tropical Diseases                                                           | Confirmed COVID-19                                                | <b>Mild to moderate:</b><br>Lopinavir/ritonavir plus<br>CQ 500 mg BID OR<br>HCQ 200 mg QD 10d                                                                                                 | <b>Severe or critical:</b><br>Remdesivir plus CQ 500 mg BID OR<br>HCQ 200 mg QD 10-20d                                               |
| Belgium: Interim clinical guidelines                                                                                 | Consider in confirmed or highly suspicious COVID-19 patients.     | <b>Mild / moderate / severe:</b><br>HCQ 400mg BID 2 doses, then 200mg BID 5d OR<br>CQ 600mg stat and 300mg BID 5d<br>If above are contraindicated:<br>lopinavir 400 mg / ritonavir 100 mg BID | <b>Critically ill:</b><br>Remdesivir IV 200 mg loading dose over 30 min followed by IV 100 mg QD for 2-10d                           |

|  |  |                                           |  |
|--|--|-------------------------------------------|--|
|  |  | 14d, starting within 10d of symptom onset |  |
|--|--|-------------------------------------------|--|

\*All drugs are administered orally unless otherwise specified. (Last update 26<sup>th</sup> March 2020)

AZT: Azithromycin, BID: 12 hourly, CDC: Center for Disease Control and Prevention, CQ: chloroquine, d: days, ESICM: European Society of Intensive and Critical Care Medicine, HCQ: hydroxychloroquine, QD: ever 24 hours, SCCM: Society of Critical Care Medicine, URTI: upper respiratory tract infection, WHO: World health Organization

**ESM Table 2**

**Candidate drugs for the treatment of COVID-19**

| Agent and class                                                                                                                          | Mechanism of action                                                                                                                                                                                                                                                                                                                                                                                                                                               | Concerns for use in people with diabetes                        | Other adverse effects                                                                                                                                                                                                                                                                                                                                                                                                                                    |
|------------------------------------------------------------------------------------------------------------------------------------------|-------------------------------------------------------------------------------------------------------------------------------------------------------------------------------------------------------------------------------------------------------------------------------------------------------------------------------------------------------------------------------------------------------------------------------------------------------------------|-----------------------------------------------------------------|----------------------------------------------------------------------------------------------------------------------------------------------------------------------------------------------------------------------------------------------------------------------------------------------------------------------------------------------------------------------------------------------------------------------------------------------------------|
| Chloroquine (4-aminoquinoline)                                                                                                           | <p>Not certain. Possible multiple mechanisms:</p> <ul style="list-style-type: none"> <li>- Inhibit viral entry to host cells by interfering glycosylation of ACE2</li> <li>- Inhibit replication by inhibiting MAP-kinase</li> <li>- Inhibit cell entry by inhibiting quinone reductase- 2 which is necessary for sialic acid biosynthesis (act as receptor)</li> <li>- Alters cell pH, thus inhibiting viral entry, transport &amp; post entry events</li> </ul> | <p>Improves glycaemic control,</p> <p>Risk of hypoglycaemia</p> | <p>Gastrointestinal disturbance</p> <p>QT prolongation – monitor ECG daily, avoid in recent MI. Risk increased when co-prescribed with azithromycin, teneligliptin, lopinavir / ritonavir and remdesivir</p> <p>Cytopenia</p> <p>Retinopathy (with long term use), maculopathy</p> <p>Vertigo, tinnitus, deafness</p> <p>Cardiomyopathy, heart failure (rare)</p> <p>Avoid in G6PD deficiency, porphyria, liver failure, myasthenia gravis, epilepsy</p> |
| <p>Hydroxychloroquine (4-aminoquinoline)</p> <p>*The structure is similar to CQ except the addition of hydroxyl moiety in a terminal</p> | Same as CQ                                                                                                                                                                                                                                                                                                                                                                                                                                                        | Same as CQ                                                      | Same as CQ. Retinopathy less common.                                                                                                                                                                                                                                                                                                                                                                                                                     |
| Remdesivir (adenosine nucleotide analogues)                                                                                              | Inhibits viral replication, probably by inhibiting                                                                                                                                                                                                                                                                                                                                                                                                                | No significant effect                                           | Limited data                                                                                                                                                                                                                                                                                                                                                                                                                                             |

|                                               |                                                                                                                                                                                                  |                                                                                                |                                                                                                         |
|-----------------------------------------------|--------------------------------------------------------------------------------------------------------------------------------------------------------------------------------------------------|------------------------------------------------------------------------------------------------|---------------------------------------------------------------------------------------------------------|
|                                               | RNA dependent RNA polymerase                                                                                                                                                                     |                                                                                                |                                                                                                         |
| Lopinavir/<br>Ritonavir (Protease inhibitors) | Inhibits formation of infectious virions                                                                                                                                                         | New onset diabetes mellitus, exacerbation of pre-existing diabetes mellitus, and hyperglycemia | Caution: multiple interactions                                                                          |
| Azithromycin (macrolide)                      | To treat secondary bacterial pneumonia with its antibacterial action. Binds to the 50s subunit of the bacterial ribosome, thus inhibiting translation of mRNA. Possible anti-inflammatory effect | No significant effect                                                                          | Abnormal liver function tests, long QT (caution with CQ, HCQ), pseudomembranous colitis, DRESS syndrome |

ECG: electrocardiogram, CQ: chloroquine, HCQ: hydroxychloroquine, G6PD: glucose 6 phosphate dehydrogenase, QT: QT interval, DRESS: Drug reaction with eosinophilia and systemic symptoms, ACE2: angiotensin converting enzyme

**ESM Table 3**

**Other investigational antiviral and immunomodulatory agents for treatment of COVID-19 (updated on 29<sup>th</sup> March 2020, [www.clinicaltrials.gov](http://www.clinicaltrials.gov))**

| <b>Drug</b>                                          | <b>Class</b>                              | <b>Mechanisms of action</b>                         |
|------------------------------------------------------|-------------------------------------------|-----------------------------------------------------|
| <b>Antivirals</b>                                    |                                           |                                                     |
| Ribavirin                                            | Nucleoside analogue                       | Inhibits viral RNA synthesis and mRNA capping       |
| Darunavir/Cobicistat                                 | Protease inhibitors                       | Blocks viral cellular entry                         |
| SARS-Cov-2 specific protease drug candidate          |                                           |                                                     |
| Favipiravir                                          | RNA polymerase inhibitors                 | Inhibits viral RNA dependent polymerase             |
| Oseltamivir                                          | Neuraminidase inhibitor                   | Inhibits viral replication                          |
| Baloxivir marboxil                                   | Viral endonuclease inhibitor              | Inhibits influenza virus multiplication             |
| Umifenovir                                           | Fusion inhibitor                          | Inhibits fusion between viral and cellular membrane |
| Carrimycin                                           | Macrolide                                 | Not certain                                         |
| Arbidol                                              | Fusion inhibitor                          | Broad spectrum antiviral                            |
| <b>Immunomodulators</b>                              |                                           |                                                     |
| <i>Non-specific, broad spectrum</i>                  |                                           |                                                     |
| Colchicine                                           | Anti-mitotic agent                        | Inhibit immune cell proliferation                   |
| Methylprednisolone                                   | Steroidal anti-inflammatory agent         | Anti-inflammatory                                   |
| Tetrandrine                                          | Calcium channel blocker                   | Anti-inflammatory and immunomodulatory              |
| Fingolimod                                           | Lymphocyte inhibitor                      | Anti-inflammatory                                   |
| Thalidomide                                          | Inhibit IL-6 production, other mechanisms | Anti-inflammatory                                   |
| Xiyanping                                            | Andrographolide – immunomodulator         | Immunomodulatory                                    |
| Aviptadil                                            | VIP analogue                              | Anti-inflammatory                                   |
| <i>Targeted immunomodulators</i>                     |                                           |                                                     |
| Interferon-β1A, interferon alpha 1β, interferon-β-1B | Cytokines                                 | Stimulate innate antiviral immunity                 |
| Aerosolized interferon α                             |                                           |                                                     |
| Tocilizumab, Sarilumab                               | Anti-IL-6 monoclonal antibody             | Inhibits IL-6 mediated inflammatory cascade         |
| Eculizumab                                           | Anti-C5 monoclonal antibody               | Inhibit complement activation and inflammation      |

|                                          |                                          |                                                                                          |
|------------------------------------------|------------------------------------------|------------------------------------------------------------------------------------------|
| SARS-Cov-2 specific antibodies           | Antibody                                 | Binds to virus and block infection, binds to infected cells and change the immune system |
| Bevacizumab                              | Anti-VEGF-A monoclonal antibody          | Inhibits angiogenesis, anti-inflammatory                                                 |
| Camostat mesylate                        | Serine protease inhibitor                | Immunomodulatory                                                                         |
| Baricitinib                              | Janus kinase inhibitor                   | Immunomodulatory                                                                         |
| aAPC                                     | Activated APCs as immunomodulators       | Facilitate immune response against infected cells                                        |
| NK cells                                 | Natural killer cells as immunomodulators | Facilitate immune response against infected cells                                        |
| <b>Combinations</b>                      |                                          |                                                                                          |
| Ribavirin plus Interferon                | Nucleoside analogue plus cytokine        | Inhibits viral replication and stimulate innate immunity                                 |
| Interferon beta plus Lopinavir/Ritonavir | Cytokine plus protease inhibitor         | stimulate innate antiviral immunity and blocks viral cellular entry                      |

APC: antigen presenting cells, IL-6: interleukin-6. NK cells: natural killer cells, VEGF-A: vascular endothelial growth factor-A
